# Supplementary material for: SIL1, a causative cochaperone gene of Marinesco-Sjögren syndrome, plays an essential role in establishing the architecture of the developing cerebral cortex
Source: PubMed Central journal article supplement (PMC3958314; doi:10.1002/emmm.201303069), 2014-01-29

Fig.3A

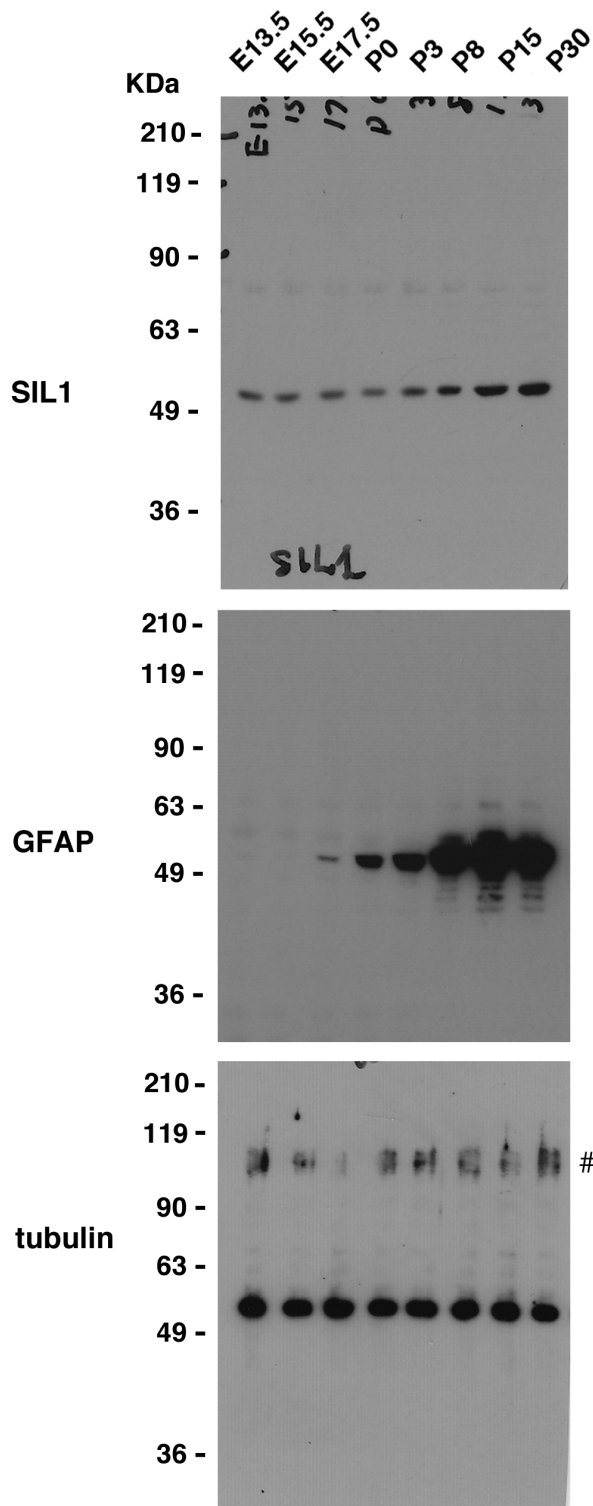

Fig. 3B

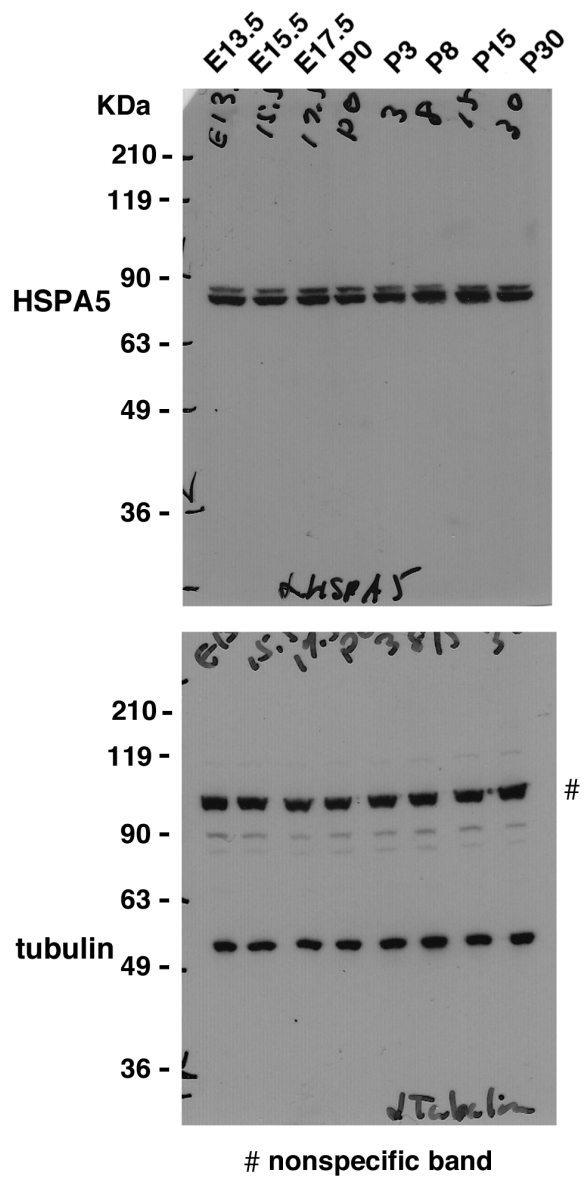

Supplement: emmm0006-0414-sd9.pdf [file emmm0006-0414-sd9.pdf]
